# Supplementary material for: Triarylamine-based hydrido-carboxylate rhenium(i) complexes as photosensitizers for dye-sensitized solar cells
Source: Royal Society of Chemistry journal article supplement (doi:10.1039/c9cp00856j), 2019-01-01
Supplement: c9cp00856j1.pdf [file c9cp00856j1.pdf]

## Supporting Information

### Triarylamine-based hydrido-carboxylate rhenium(I) complexes as photosensitizers for dye-sensitized solar cells.

Lorenzo Veronese,<sup>a,b</sup> Elsa Quartapelle Procopio,<sup>a</sup> Thomas Moehl,<sup>c</sup> Monica Panigati,<sup>\*,a,b</sup> Kazuteru Nonomura,<sup>\*,d</sup> Anders Hagfeldt<sup>d</sup>

<sup>a</sup> Università degli Studi di Milano, Dipartimento di Chimica, Via Golgi 19, 20133 Milano (Italy)

<sup>b</sup> Istituto per lo Studio delle Macromolecole, Consiglio Nazionale delle Ricerche (ISMAR-CNR), Via E. Bassini, 15, 20133 Milano, Italy

<sup>c</sup> Department of Chemistry, University of Zurich, Winterthurerstrasse 190, CH-8057, Zürich (Switzerland)

<sup>d</sup> Laboratory for Photomolecular Science, ISIC, École Polytechnique Fédérale de Lausanne, CH-1015 Lausanne (Switzerland)

### List of Contents

|    |                                                                                                          |       |
|----|----------------------------------------------------------------------------------------------------------|-------|
| 1. | <b>Figure S1:</b> Hydrogens on D35 derivatives labeled for NMR spectra interpretation                    | pg. 2 |
| 2. | <b>Figure S2:</b> <sup>1</sup> H-NMR spectrum of [Re <sub>2</sub> (μ-H)(μ-D35)(CO) <sub>6</sub> (μ-ppd)] | pg. 3 |
| 3. | <b>Figure S3:</b> <sup>1</sup> H-NMR spectrum of <b>2</b>                                                | pg. 4 |
| 4. | <b>Figure S4:</b> <sup>1</sup> H-NMR spectrum of <b>3</b>                                                | pg. 5 |
| 5. | <b>Figure S5:</b> UV-Vis absorption spectra of dyes <b>1-3</b> absorbed on TiO <sub>2</sub>              | pg. 6 |
| 5. | <b>Table S1:</b> Photovoltaic parameters for optimized cells sensitized by <b>1</b>                      | pg. 7 |

**Figure S1.** Hydrogens on **D35** derivatives labeled for NMR spectra interpretation

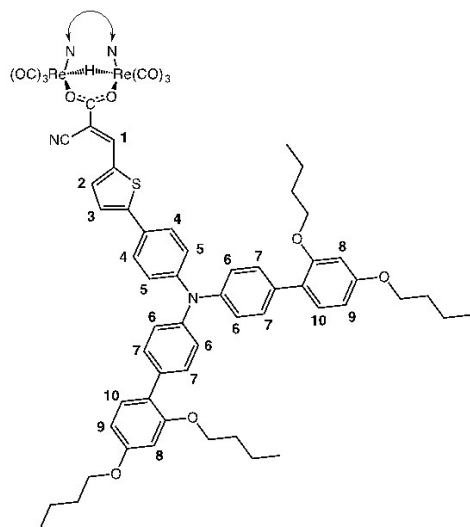

**Figure S2.**  $^1\text{H}$  NMR spectrum of  $[\text{Re}_2(\mu\text{-H})(\mu\text{-D35})(\text{CO})_6(\mu\text{-ppd})]$  in  $\text{CD}_2\text{Cl}_2$  (400 MHz)

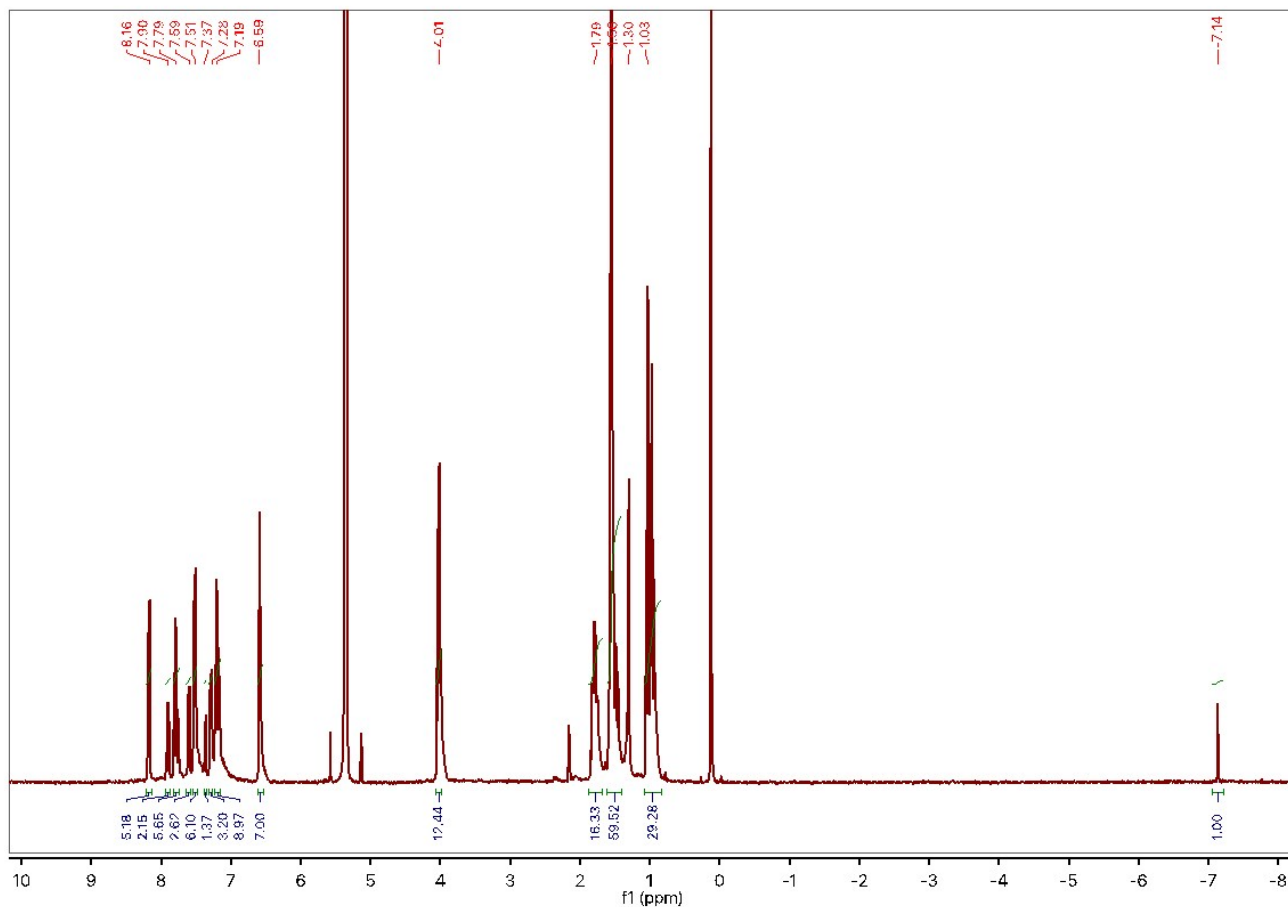

**Figure S3.**  $^1\text{H}$  NMR spectrum of **2** in  $\text{CD}_2\text{Cl}_2$  (400 MHz)

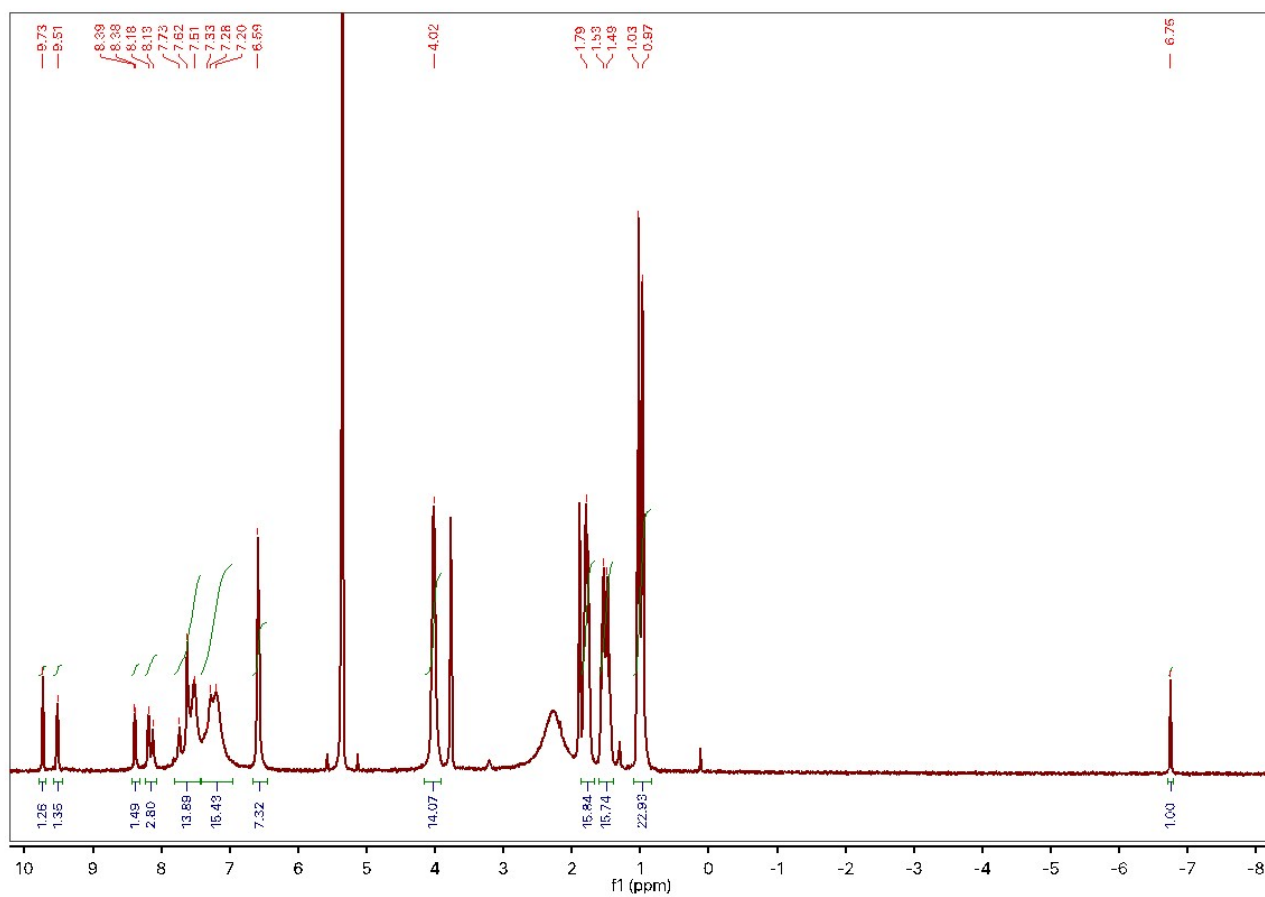

Figure S4. <sup>1</sup>H NMR spectrum of **3** in CD<sub>2</sub>Cl<sub>2</sub> (400 MHz)

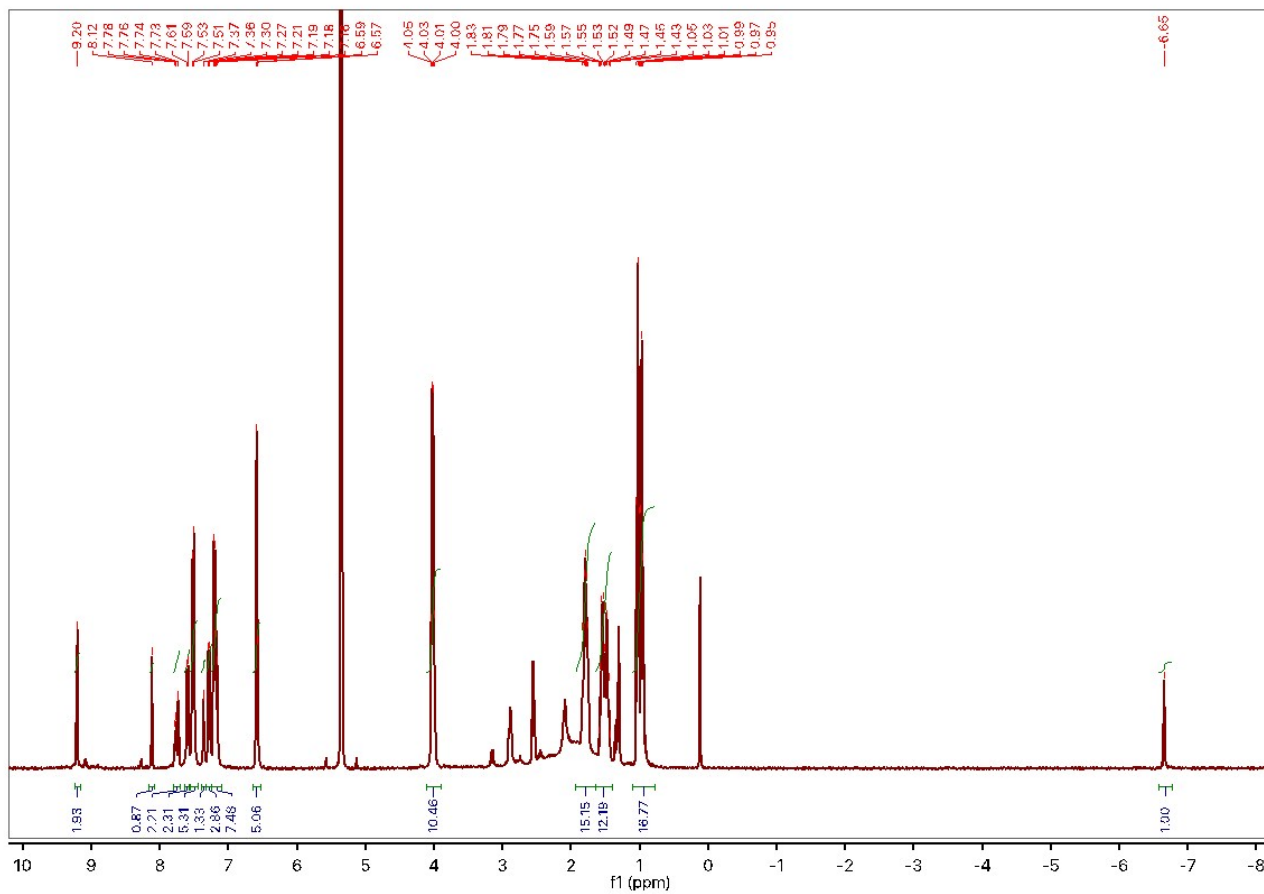

**Figure S5:** UV-Vis absorption spectra of dyes **1-3** absorbed on TiO<sub>2</sub>

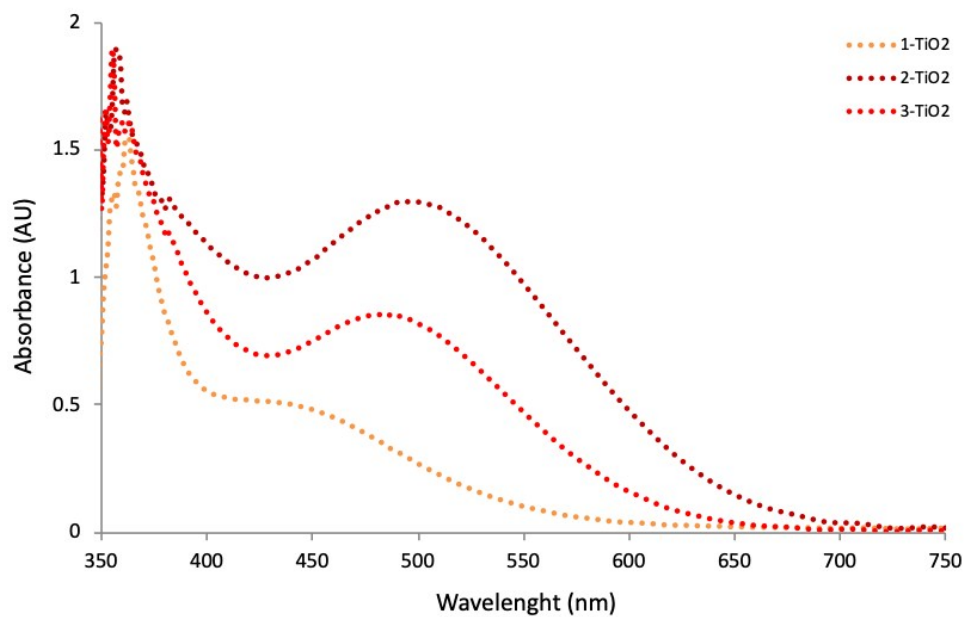

**Table S1:** Photovoltaic parameters for optimized cells sensitized by **1** using homemade Iodine based (IE) and cobalt (CE) electrolytes. SnO<sub>2</sub> has been used as semiconductor only with dye **1**, in two different conditions: as transparent layer alone and coupled with a TiO<sub>2</sub> scattering layer (please note that thickness, counters and electrolytes are comparable to the all- TiO<sub>2</sub> cells reported in the draft). In addition to that, I have also tried a bromide/tribromide electrolyte on these cells with tin oxide, but the electrolyte almost instantly swept away/degraded the dye and those cells did not perform at all.

| <b>DYE 1</b>                                                           | I <sup>-</sup> /I <sup>3-</sup>       |                     |      |       | Co <sup>2+</sup> /Co <sup>3+</sup>    |         |      |       |
|------------------------------------------------------------------------|---------------------------------------|---------------------|------|-------|---------------------------------------|---------|------|-------|
|                                                                        | J <sub>sc</sub> (mA/cm <sup>2</sup> ) | V <sub>oc</sub> (V) | FF   | η (%) | J <sub>sc</sub> (mA/cm <sup>2</sup> ) | Voc (V) | FF   | η (%) |
| SnO <sub>2</sub> transparent layer                                     | -0.57                                 | 0.36                | 0.62 | 0.13  | -0.66                                 | 0.34    | 0.56 | 0.13  |
| SnO <sub>2</sub> transparent layer + TiO <sub>2</sub> scattering layer | -1.41                                 | 0.39                | 0.6  | 0.33  | -2.17                                 | 0.39    | 0.65 | 0.55  |
